# Supplementary material for: NH3/H2O-mediated proton conductivity and photocatalytic behaviour of Fe(ii)-hydroxyphosphonoacetate and M(ii)-substituted derivatives
Source: Royal Society of Chemistry journal article supplement (doi:10.1039/c9dt04210e), 2020-01-01
Supplement: c9dt04210e2.pdf [file c9dt04210e2.pdf]

## Electronic Supplementary Information

For

# NH<sub>3</sub>/H<sub>2</sub>O-mediated proton conductivity and photocatalytic behaviour of Fe(II)-hydroxyphosphonoacetate and M(II)-substituted derivatives

Inés R. Salcedo,<sup>a</sup> Montse Bazaga-García,<sup>a</sup> Ana Cuesta,<sup>a</sup> Enrique R. Losilla,<sup>a</sup> Konstantinos D. Demadis,<sup>b</sup> Pascual Olivera-Pastor,<sup>a</sup> Rosario M.P. Colodrero,<sup>c\*</sup> Aurelio Cabeza<sup>a\*</sup>

<sup>a</sup>*Departamento de Química Inorgánica, Universidad de Málaga, Campus Teatinos s/n, Málaga-29071, Spain; Tel: +34 952131874; E-mail: [aurelio@uma.es](mailto:aurelio@uma.es)*

<sup>b</sup>*Crystal Engineering, Growth and Design Laboratory, Department of Chemistry, University of Crete, Voutes Campus, Crete GR-71003, Greece.*

<sup>c</sup>*Faculty of Science & Engineering, University of Wolverhampton, Wulfruna Street, Wolverhampton WV1 1LY, UK.; E-mail: [r.perezcolodrero@wlv.ac.uk](mailto:r.perezcolodrero@wlv.ac.uk)*

### Table of contents:

#### Figures:

**Figure S1.** X-ray powder diffraction patterns for **Fe-NH<sub>3</sub>-xh**, **Fe<sub>0.41</sub>Zn<sub>0.59</sub>-NH<sub>3</sub>-xh** and **Fe<sub>0.71</sub>Zn<sub>0.29</sub>-NH<sub>3</sub>-xh** derivatives.

**Figure S2.** XRPD Rietveld plots for **Fe-HPAA** (a) and **Zn-HPAA** (b).

**Figure S3.** Final Rietveld plots for **Fe<sub>0.89</sub>Zn<sub>0.11</sub>-HPAA** (a), **Fe<sub>0.71</sub>Zn<sub>0.29</sub>-HPAA** (b), **Fe<sub>0.54</sub>Zn<sub>0.46</sub>-HPAA** (c) and **Fe<sub>0.41</sub>Zn<sub>0.59</sub>-HPAA** (d).

**Figure S4.** XRD pattern comparison of physical mixture of **Fe-HPAA/Zn-HPAA** (70/30 % w/w) and bimetallic systems in the 16-18° angular region (**Fe-HPAA**, green line; **Zn-HPAA**, blue line, mixture **Fe-HPAA/Zn-HPAA**, red line and **Fe<sub>0.71</sub>Zn<sub>0.29</sub>-HPAA**, black line).

**Figure S5.** Phase identification for compounds  $\text{Fe}_x\text{M}_{1-x}\text{-HPAA}$  ( $\text{M}^{2+}=\text{Co, Zn}$ ) calcined at 1000 °C under (a)  $\text{N}_2$  or (b)  $\text{H}_2$  atmospheres.

**Figure S6.** Rietveld plots for  $\text{Fe}[\text{HO}_3\text{PCH}(\text{OH})\text{CO}_2] \cdot (\text{NH}_3)_x \cdot (\text{H}_2\text{O})_y$  (**Fe-NH<sub>3</sub>-xh**).

**Figure S7.** X-ray Pair Distribution Function (PDF) analysis. Observed (blue symbol) and calculated (red line) PDF patterns of **Fe-HPAA** (a), **Fe-NH<sub>3</sub>-36h** (b), **Fe-NH<sub>3</sub>-48h** (c) in the range 1.4-10 Å (left) and 10-50 Å (right).

**Figure S8.** TG and DTA curves for compounds **Fe-HPAA** (a) and **Fe-NH<sub>3</sub>-72h** (b).

**Figure S9.** Rietveld refinement plots for  $\text{Fe}_2\text{P}_2\text{O}_7$  obtained by calcination under  $\text{N}_2$  at 700 °C of **Fe-HPAA** (a) and **Fe-NH<sub>3</sub>-72h** (b).

**Figure S10.** Plots of the complex impedance plane for **Fe-NH<sub>3</sub>-xh** derivatives at 95% RH and various temperatures: 80 (black), 70 (red), 60 (green), 50 (blue), 40 (cyan), 30 (magenta) and 25 °C (yellow).

**Figure S11.** Plots of the complex impedance plane for **Fe<sub>0.41</sub>Zn<sub>0.59</sub>-NH<sub>3</sub>-xh** and **Fe<sub>0.71</sub>Zn<sub>0.29</sub>-NH<sub>3</sub>-xh** derivatives at 95% RH and various temperatures: 80 (black), 70 (red), 60 (green), 50 (blue), 40 (cyan), 30 (magenta) and 25 °C (yellow).

**Figure S12.** FTIR spectra for compounds **Fe-HPAA** (a) and **Fe-NH<sub>3</sub>-72h** (b).

**Figure S13.** Size distribution by intensity for compounds **Fe-HPAA** (a) and **Fe-NH<sub>3</sub>-72h** (b).

**Figure S14.** Size distribution by intensity before (a, c) and post impedance (b, d) measurements for **Fe<sub>0.41</sub>Zn<sub>0.59</sub>-HPAA** (a, b) and **Fe<sub>0.41</sub>Zn<sub>0.59</sub>-NH<sub>3</sub>-1h** (c, d).

**Figure S15.** Size distribution by intensity for **Fe<sub>0.71</sub>Zn<sub>0.29</sub>-HPAA** (a) and **Fe<sub>0.71</sub>Zn<sub>0.29</sub>-NH<sub>3</sub>-5h** (b) before and post impedance measurements.

**Figure S16.** Time evolution of total iron, phosphorus and zinc leached for the photocatalytic reactions of (a) **phenol** and **Fe<sub>0.71</sub>Zn<sub>0.29</sub>-HPAA** under visible irradiation, **4-chlorophenol** and **Fe-HPAA** (b) under visible and (c) UVA irradiation, (d) **methylene blue** and **Fe-HPAA** under UVA irradiation.

**Figure S17.** Mössbauer absorption spectra for **Fe-HPAA** solids: (green) as-synthesized; (red) spent photocatalyst after phenol photodegradation in the presence of UVA light; (blue) **Fe-HPAA** as-synthesized (from an acetate-buffered  $\text{FeSO}_4 \cdot 7\text{H}_2\text{O}$  + HPAA solution) at 100 °C; (black) as-synthesized at 140 °C.

**Figure S18.** Time evolution of TOC removal for phenol degradation with **Fe-HPAA** under visible light for different cycles: first (orange) and second (olive).

**Figure S19.** X-ray powder diffraction patterns for as-synthesized **Fe-HPAA** (red) and after photocatalytic test under visible irradiation (black).

**Tables:**

**Table S1.** Elemental analysis and stoichiometries for **Fe-NH<sub>3</sub>-xh** and **Fe<sub>x</sub>Zn<sub>1-x</sub>-NH<sub>3</sub>-xh**.

**Table S2.** Selected crystallographic data for **Fe-HPAA**, **Zn-HPAA** and **Fe<sub>x</sub>Zn<sub>1-x</sub>-HPAA**.

**Table S3.** Chemical composition for compounds **Fe<sub>x</sub>M<sub>1-x</sub>-HPAA** (M = Mn<sup>2+</sup>, Co<sup>2+</sup> and Zn<sup>2+</sup>).

**Table S4.** XPS Fe(II)/Fe(III) atomic ratio.

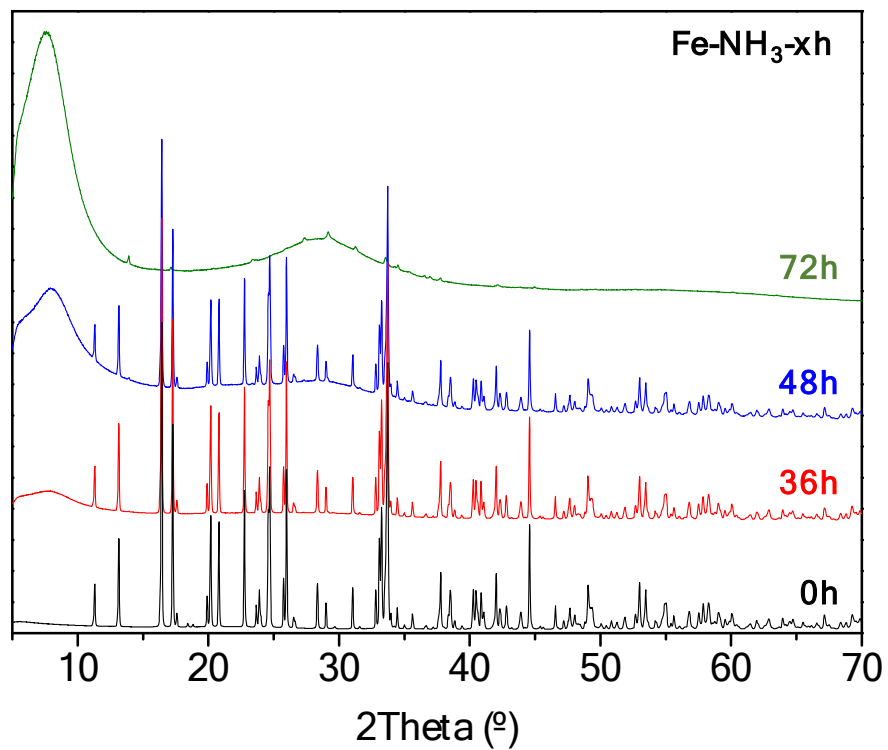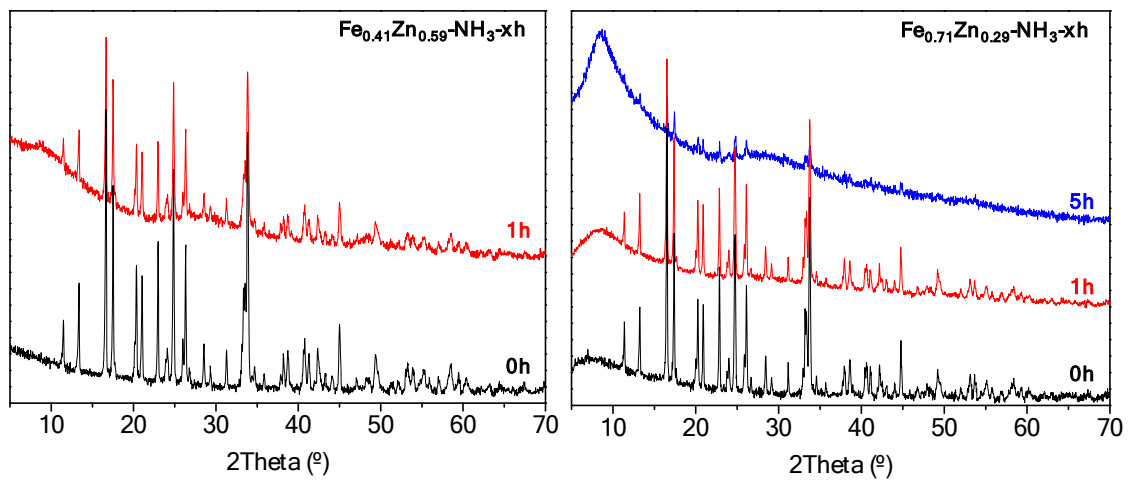

**Figure S1.** X-ray powder diffraction patterns for  $\text{Fe-NH}_3\text{-xh}$ ,  $\text{Fe}_{0.41}\text{Zn}_{0.59}\text{-NH}_3\text{-xh}$  and  $\text{Fe}_{0.71}\text{Zn}_{0.29}\text{-NH}_3\text{-xh}$  derivatives.

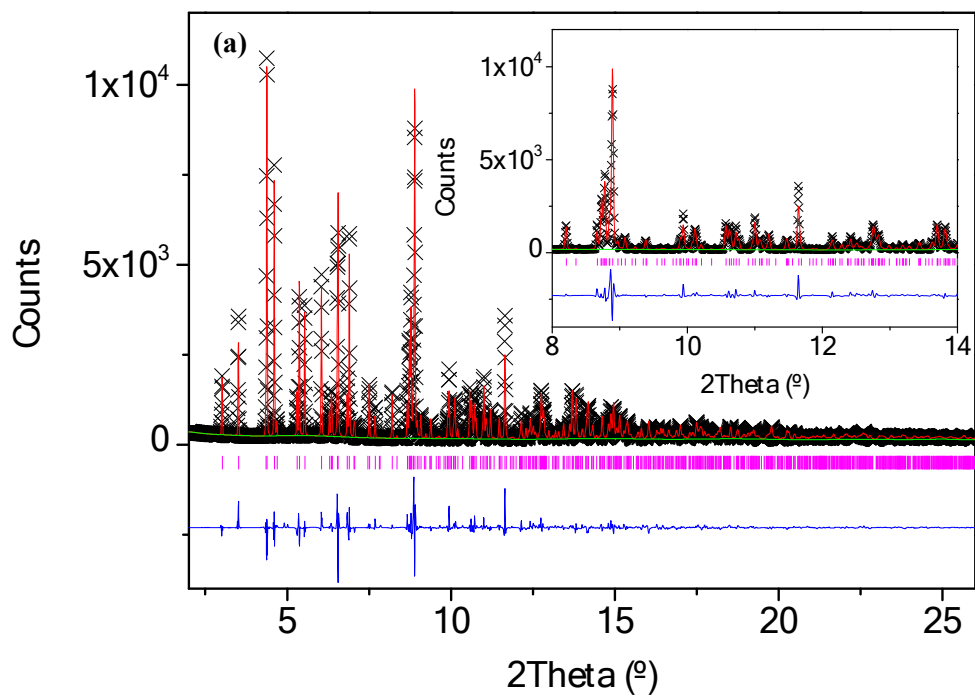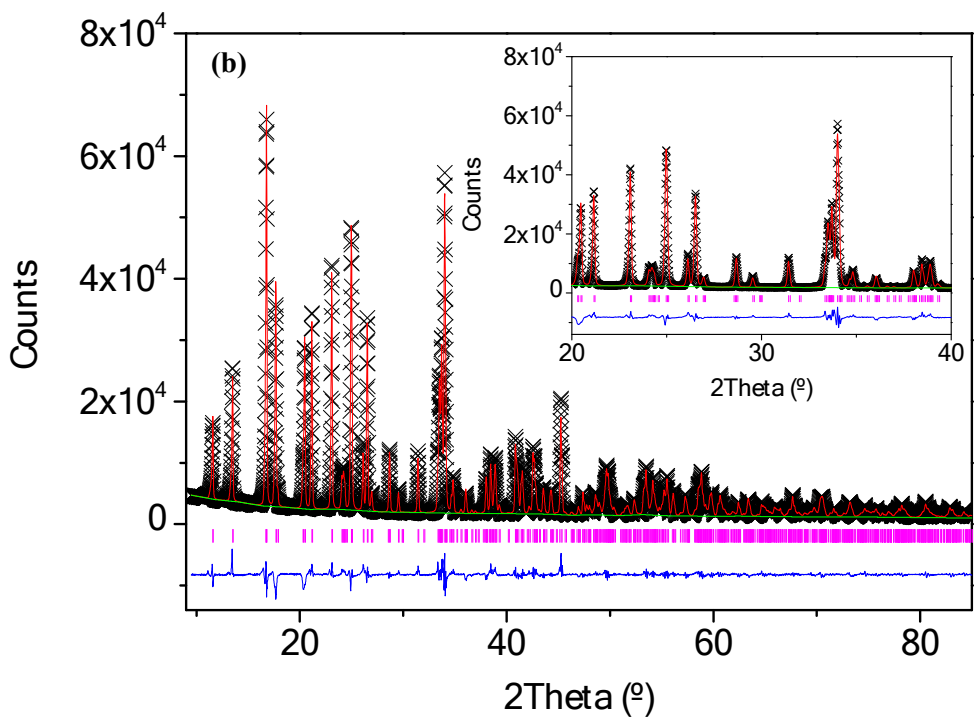

Figure S2. XRPD Rietveld plots for Fe-HPAA (a) and Zn-HPAA (b).

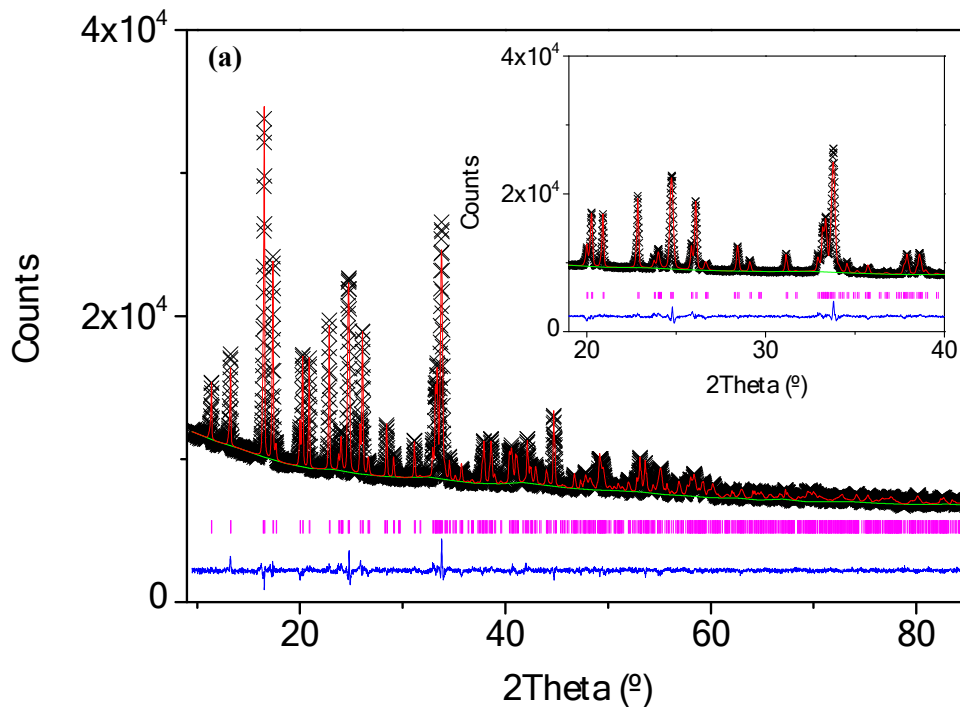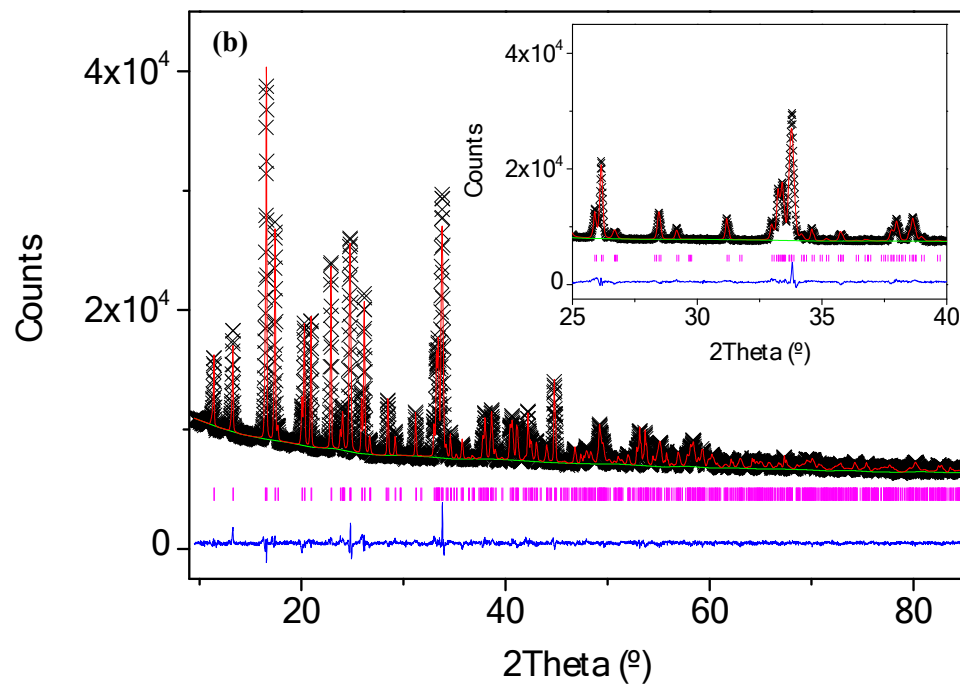

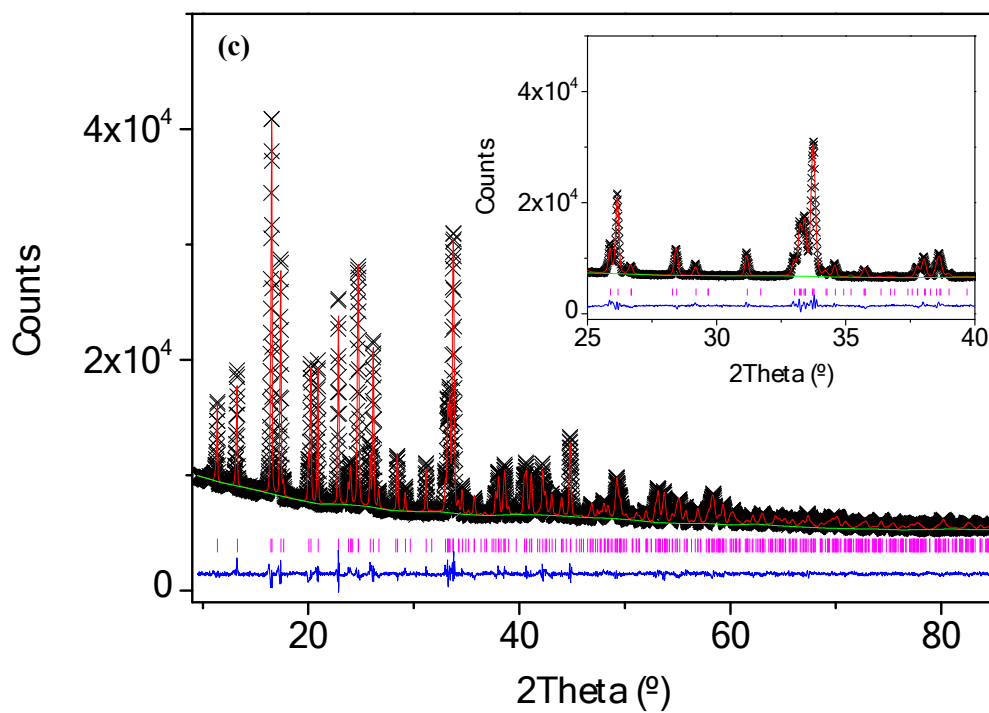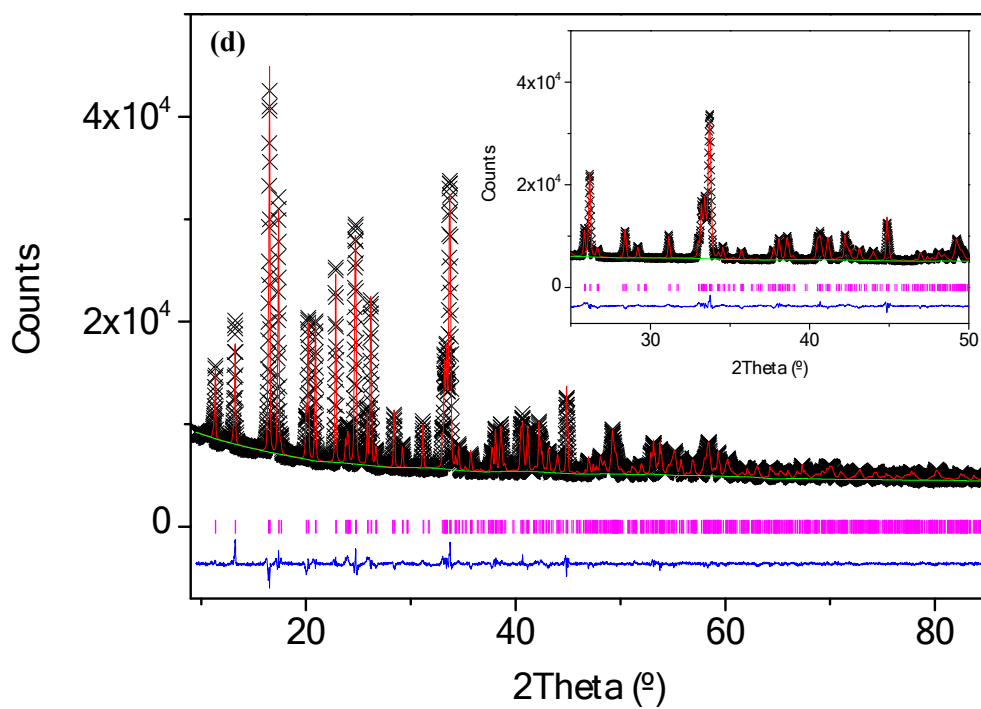

Figure S3. Final Rietveld plots for  $\text{Fe}_{0.89}\text{Zn}_{0.11}\text{-HPAA}$  (a),  $\text{Fe}_{0.71}\text{Zn}_{0.29}\text{-HPAA}$  (b),  $\text{Fe}_{0.54}\text{Zn}_{0.46}\text{-HPAA}$  (c) and  $\text{Fe}_{0.41}\text{Zn}_{0.59}\text{-HPAA}$  (d).

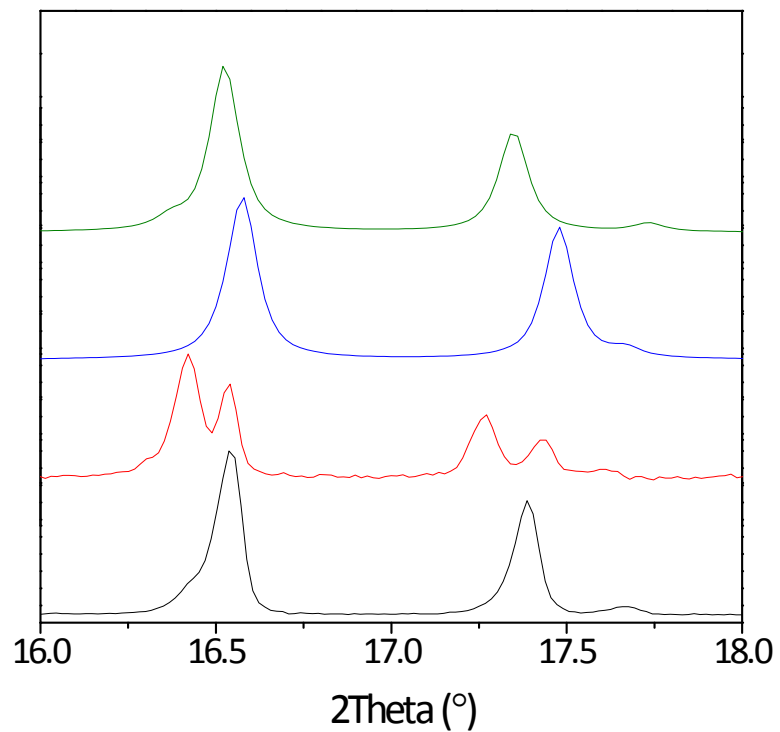

**Figure S4.** XRD pattern comparison of physical mixture of **Fe-HPAA/Zn-HPAA** (70/30 % w/w) and bimetallic systems in the 16-18° angular region (**Fe-HPAA**, green line; **Zn-HPAA**, blue line, mixture **Fe-HPAA/Zn-HPAA**, red line and **Fe<sub>0.71</sub>Zn<sub>0.29</sub>-HPAA**, black line).



(a)

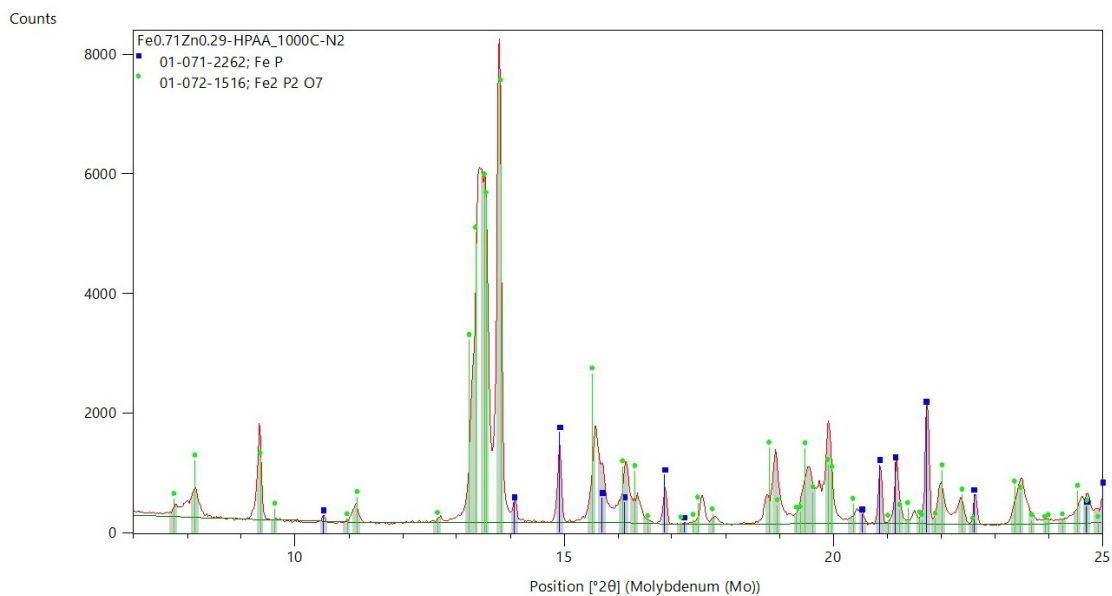

(b)

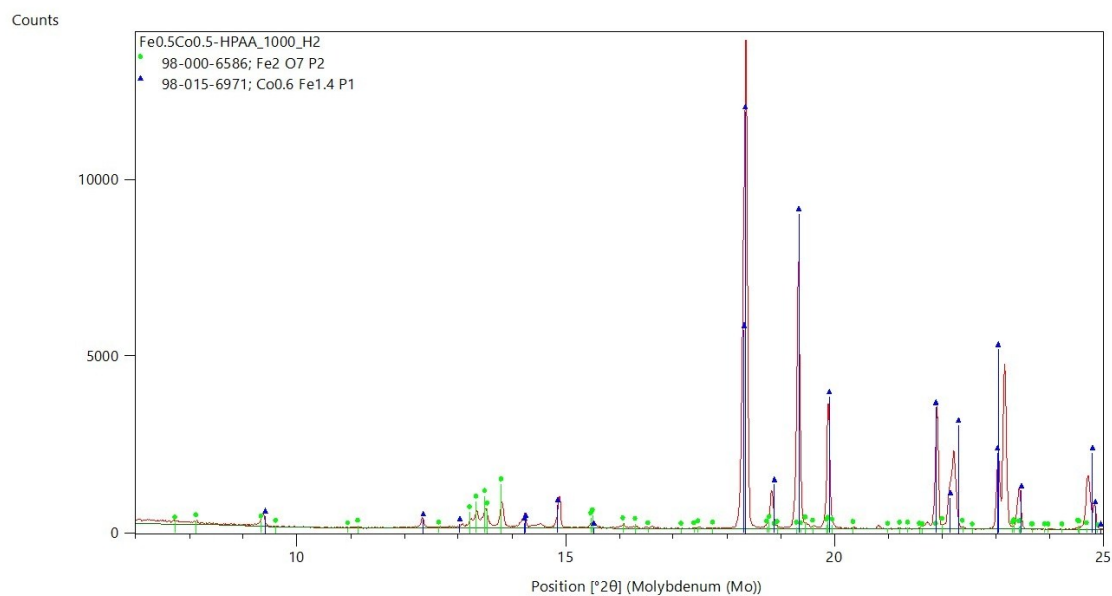

**Figure S5.** Phase identification for compounds  $\text{Fe}_x\text{M}_{1-x}\text{-HPAA}$  ( $\text{M}^{2+}=\text{Co}, \text{Zn}$ ) calcined at 1000 °C under (a)  $\text{N}_2$  or (b)  $\text{H}_2$  atmospheres.

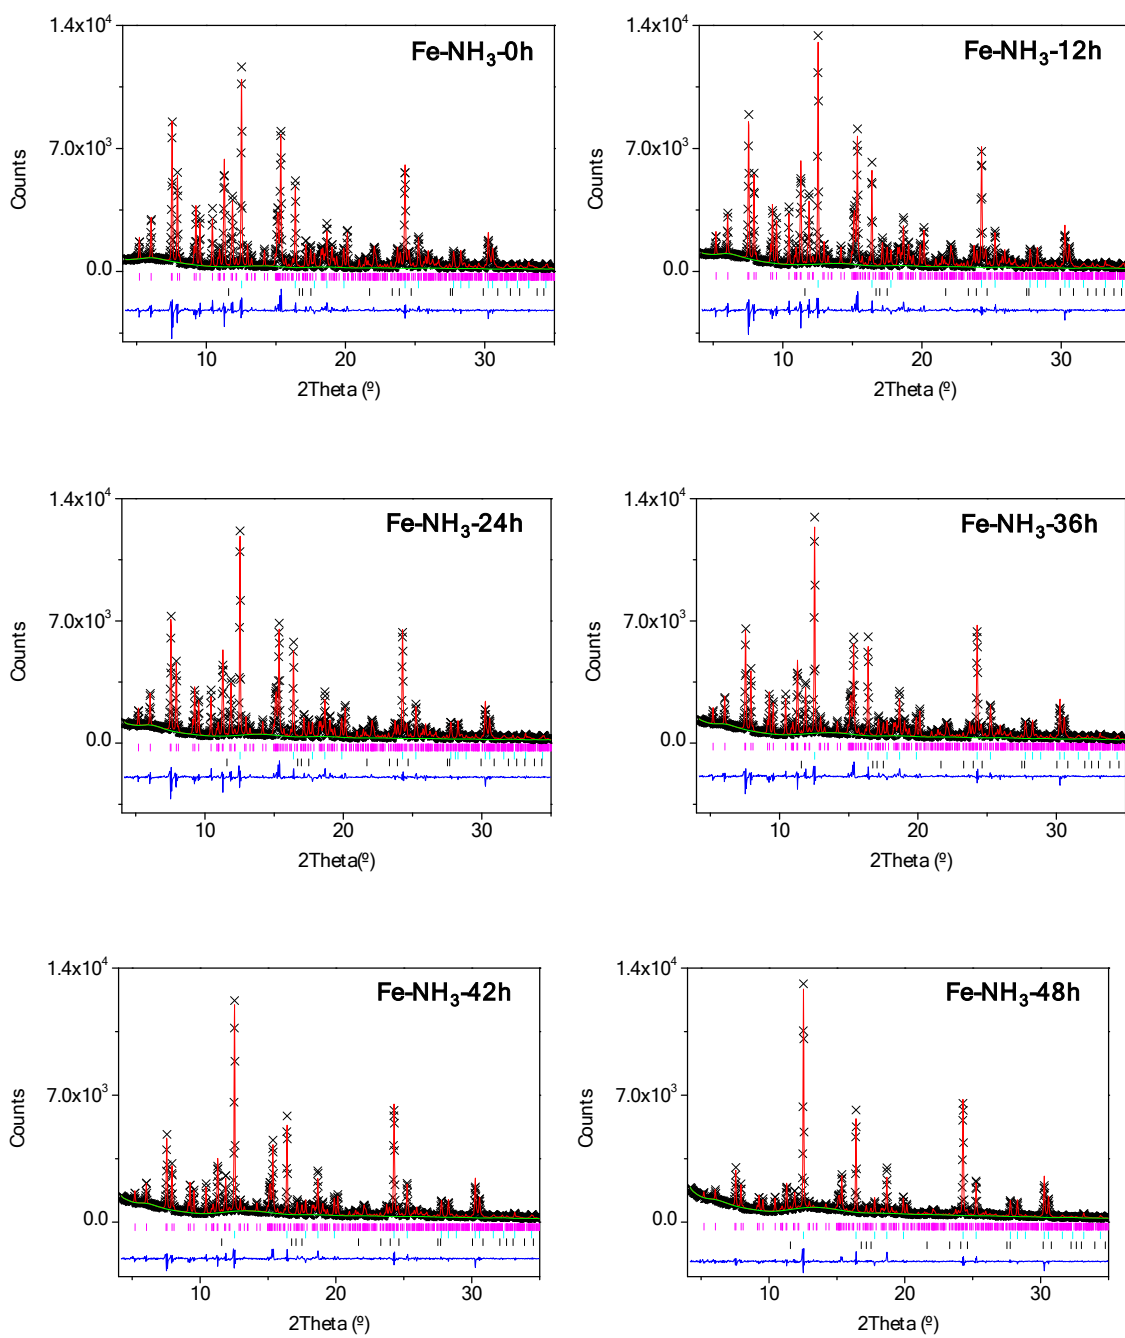

**Figure S6.** Rietveld plots for  $\text{Fe}[\text{HO}_3\text{PCH}(\text{OH})\text{CO}_2] \cdot (\text{NH}_3)_x \cdot (\text{H}_2\text{O})_y$  (Fe-NH<sub>3</sub>-xh).

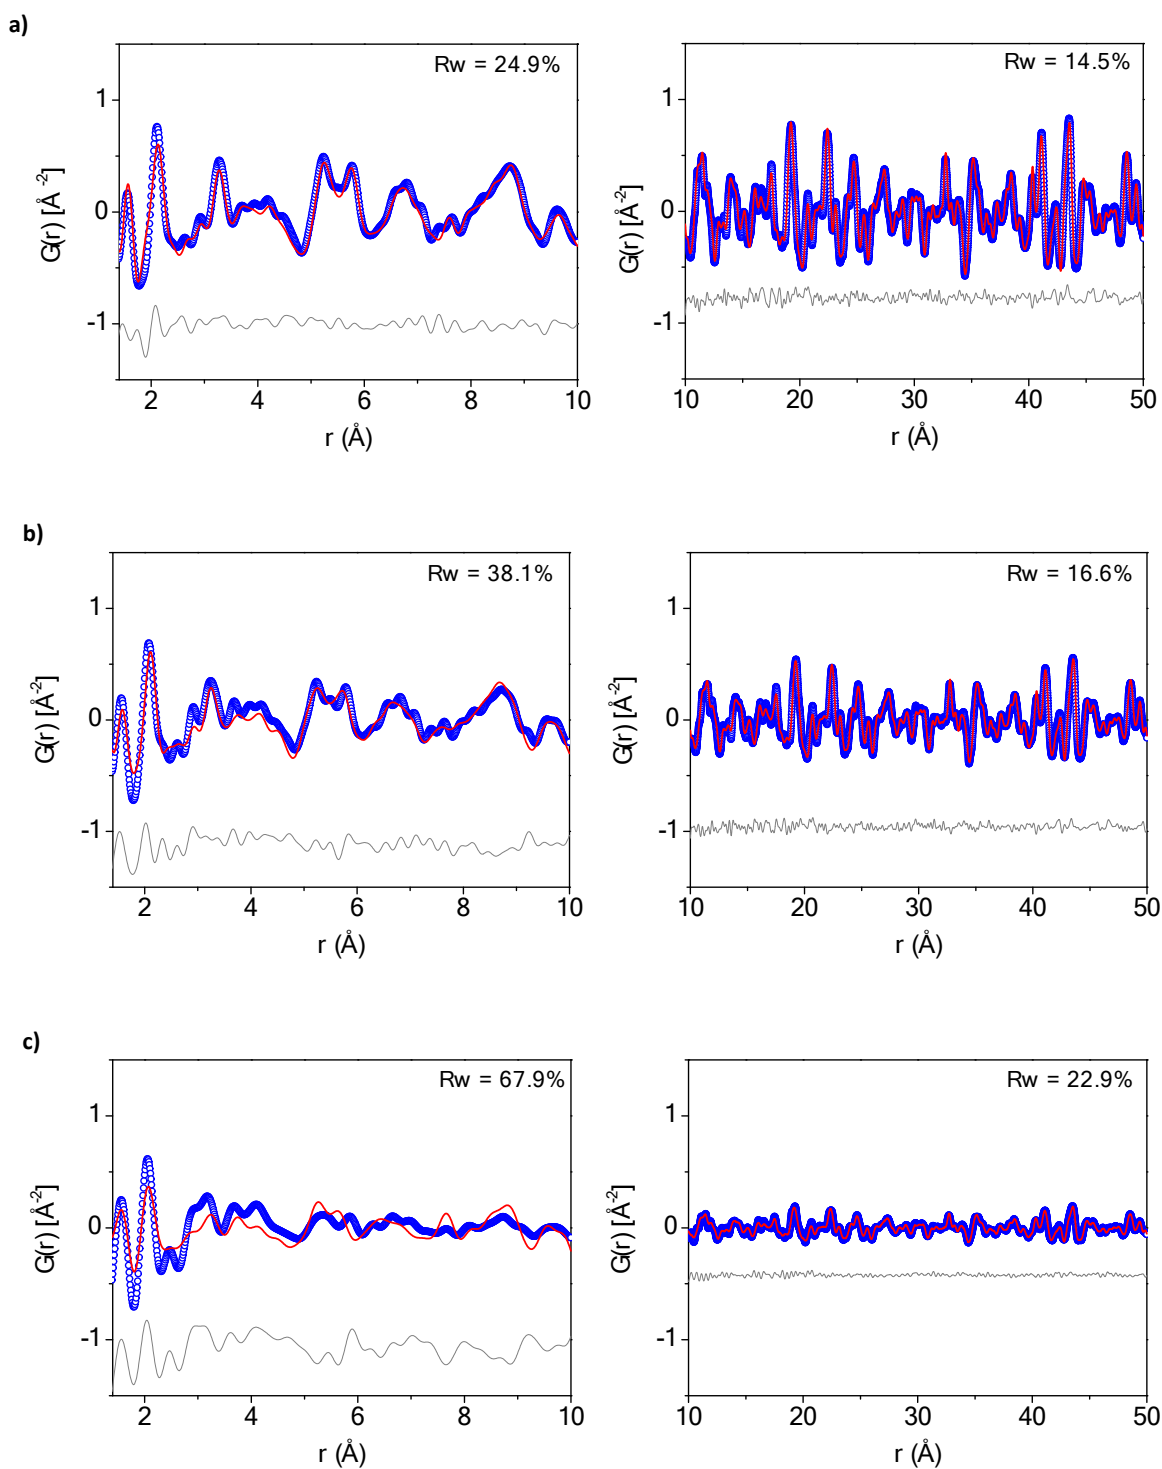

**Figure S7.** X-ray Pair Distribution Function (PDF) analysis. Observed (blue symbol) and calculated (red line) PDF patterns of **Fe-HPAA** (a), **Fe-NH<sub>3</sub>-36h** (b), **Fe-NH<sub>3</sub>-48h** (c) in the range 1.4-10 Å (left) and 10-50 Å (right).

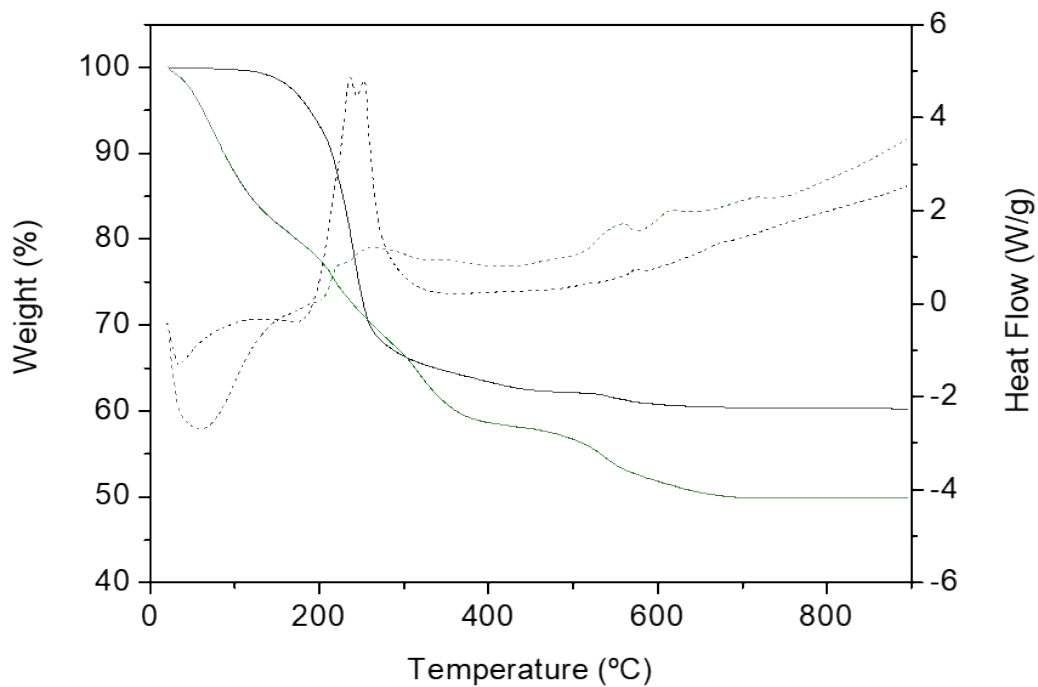

Figure S8. TG and DTA curves for compounds **Fe-HPAA** (a) and **Fe-NH<sub>3</sub>-72h** (b).

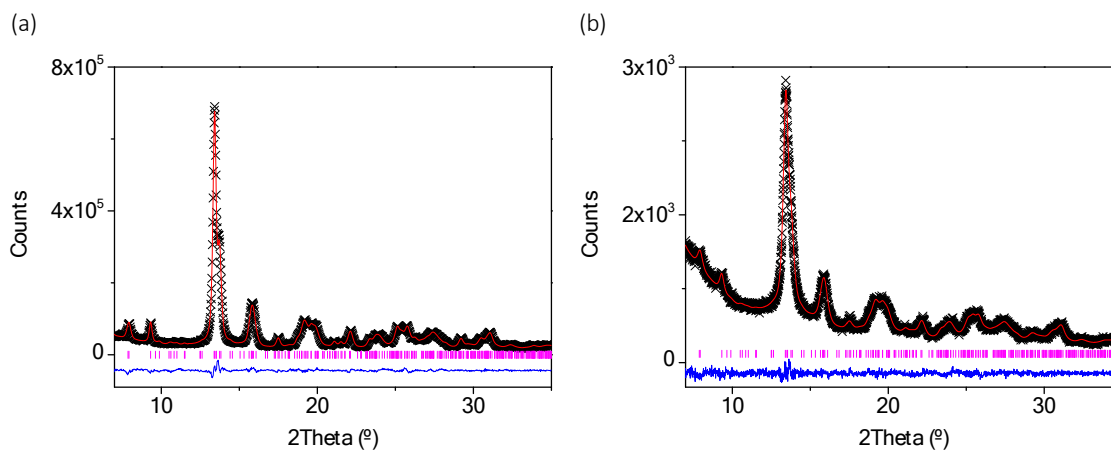

Figure S9. Rietveld refinement plots for **Fe<sub>2</sub>P<sub>2</sub>O<sub>7</sub>** obtained by calcination under N<sub>2</sub> at 700 °C of **Fe-HPAA** (a) and **Fe-NH<sub>3</sub>-72h** (b).

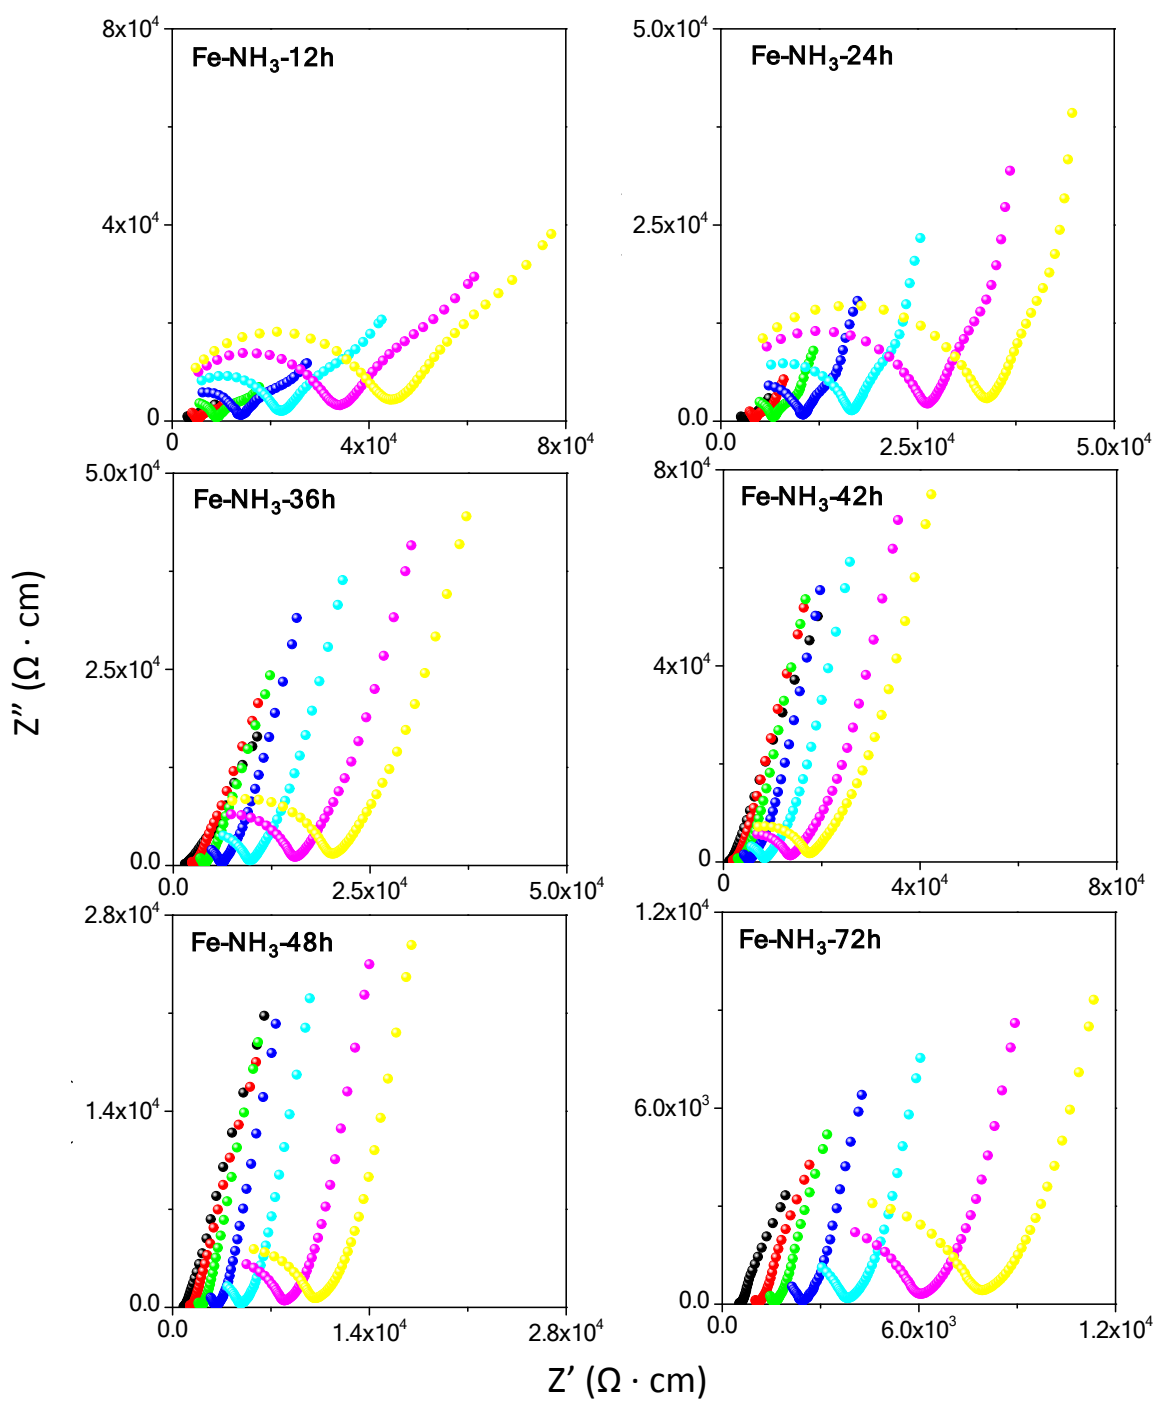

**Figure S10.** Plots of the complex impedance plane for **Fe-NH<sub>3</sub>-xh** derivatives at 95% RH and various temperatures: 80 (black), 70 (red), 60 (green), 50 (blue), 40 (cyan), 30 (magenta) and 25 °C (yellow).

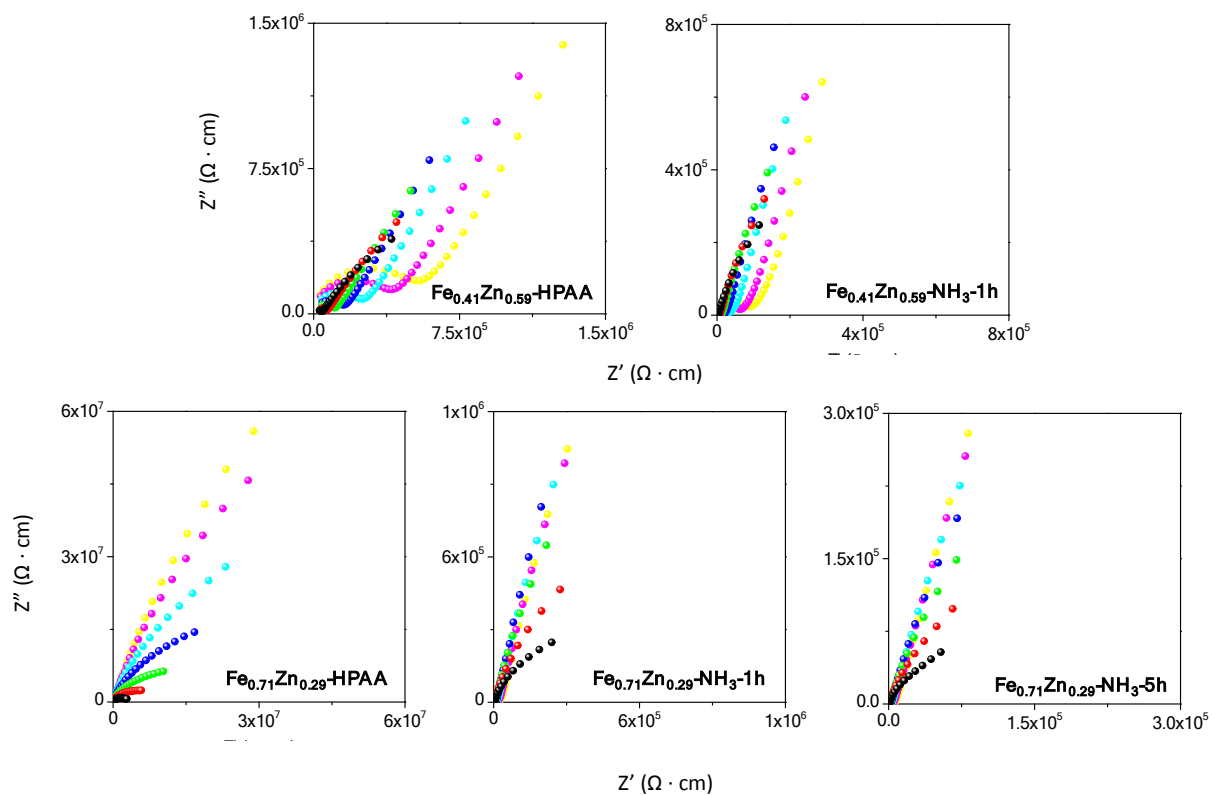

**Figure S11.** Plots of the complex impedance plane for  $\text{Fe}_{0.41}\text{Zn}_{0.59}\text{-NH}_3\text{-xh}$  and  $\text{Fe}_{0.71}\text{Zn}_{0.29}\text{-NH}_3\text{-xh}$  derivatives at 95% RH and various temperatures: 80 (black), 70 (red), 60 (green), 50 (blue), 40 (cyan), 30 (magenta) and 25 °C (yellow).

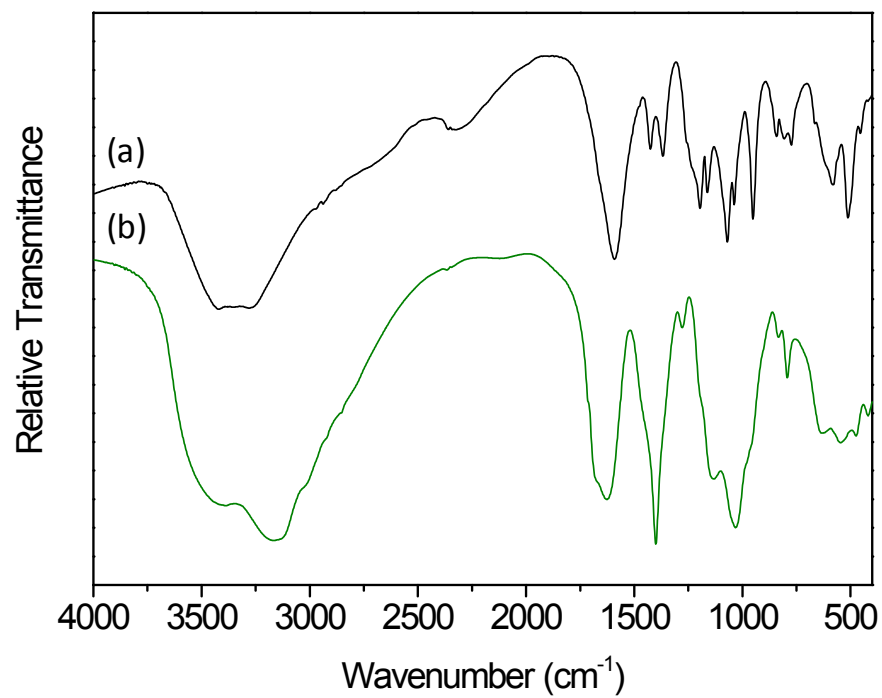

**Figure S12.** FTIR spectra for compounds **Fe-HPAA** (a) and **Fe-NH<sub>3</sub>-72h** (b).

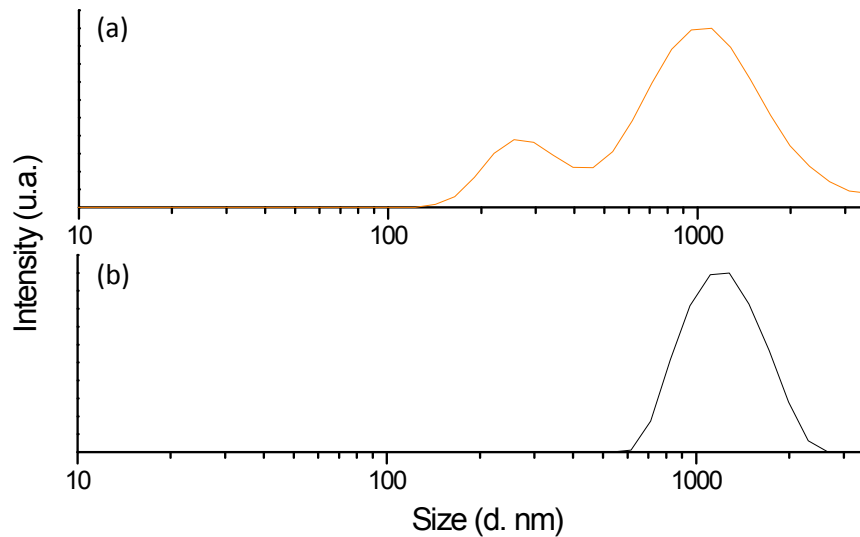

**Figure S13.** Size distribution by intensity for compounds **Fe-HPAA** (a) and **Fe-NH<sub>3</sub>-72h** (b).

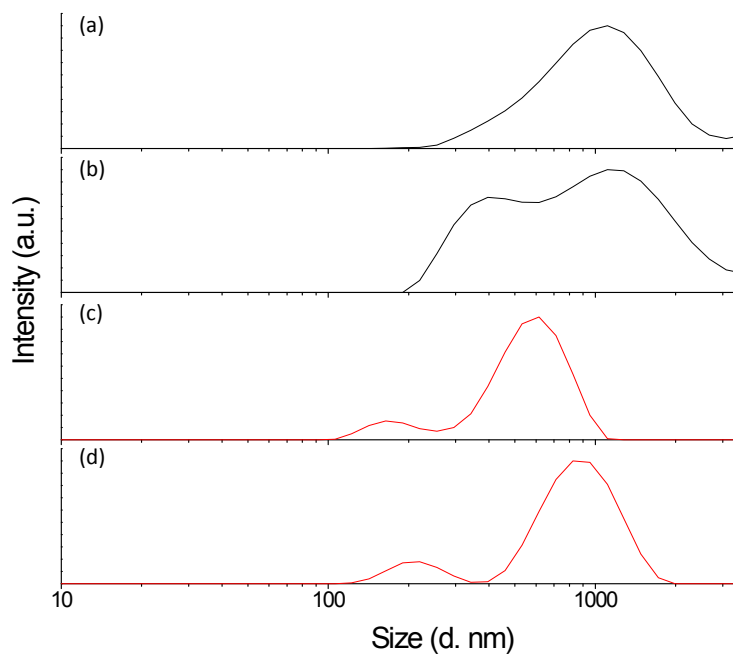

**Figure S14.** Size distribution by intensity before (a, c) and post impedance (b, d) measurements for **Fe<sub>0.41</sub>Zn<sub>0.59</sub>-HPAA** (a, b) and **Fe<sub>0.41</sub>Zn<sub>0.59</sub>-NH<sub>3</sub>-1h** (c, d).



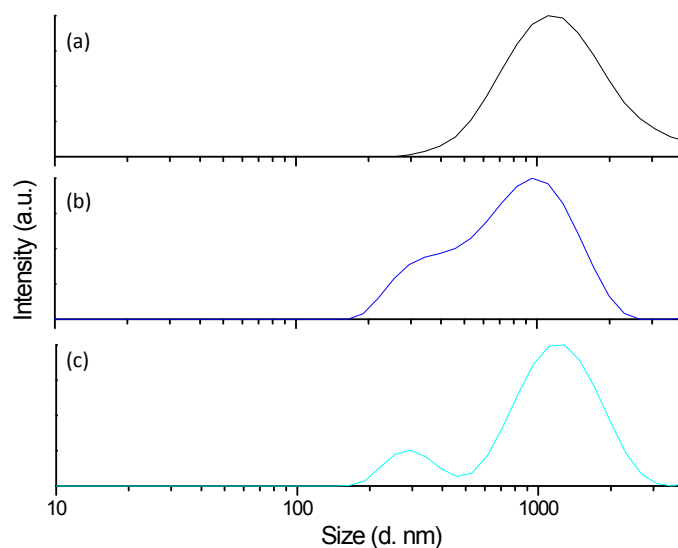

**Figure S15.** Size distribution by intensity for  $\text{Fe}_{0.71}\text{Zn}_{0.29}\text{-HPAA}$  (a) and  $\text{Fe}_{0.71}\text{Zn}_{0.29}\text{-NH}_3\text{-5h}$  (b) before and post impedance measurements.

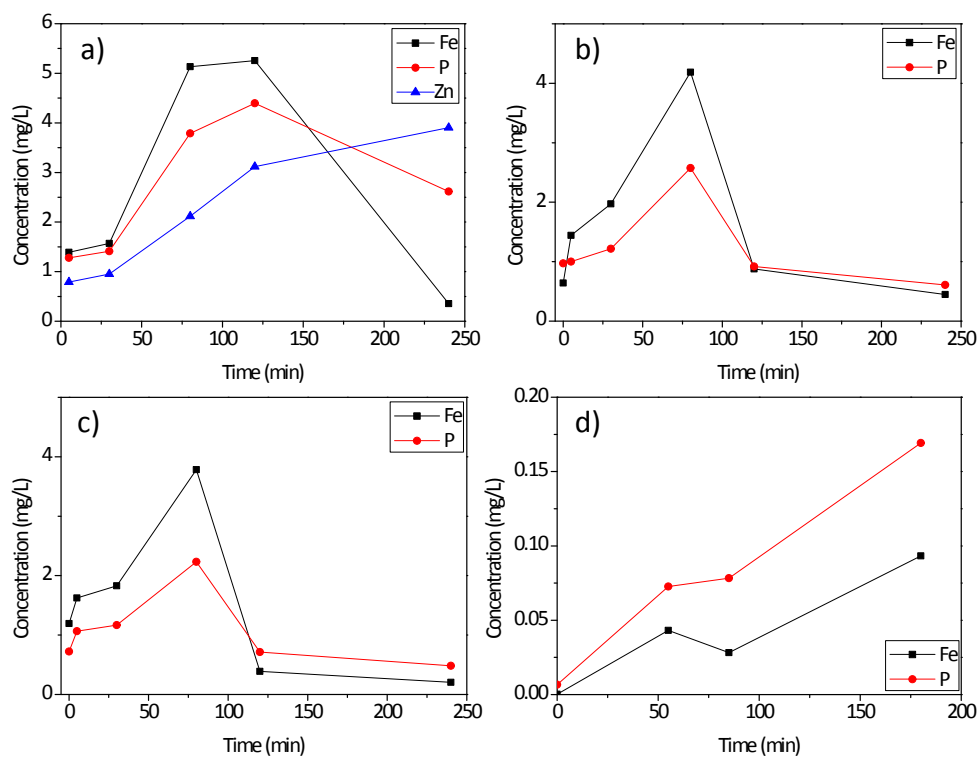

**Figure S16.** Time evolution of total iron, phosphorus and zinc leached for the photocatalytic reactions of (a) **phenol** and  $\text{Fe}_{0.71}\text{Zn}_{0.29}\text{-HPAA}$  under visible irradiation, **4-chlorophenol** and  $\text{Fe-HPAA}$  (b) under visible and (c) UVA irradiation, (d) **methylene blue** and  $\text{Fe-HPAA}$  under UVA irradiation.

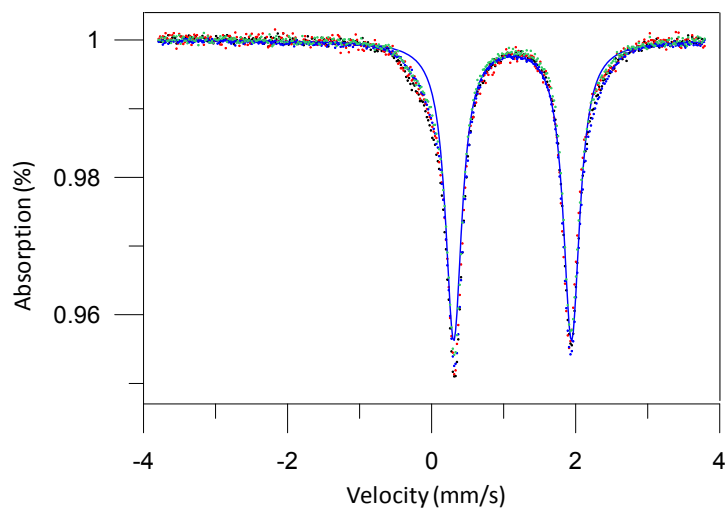

**Figure S17.** Mössbauer absorption spectra for **Fe-HPAA** solids: (green) as-synthesized; (red) spent photocatalyst after phenol photodegradation in the presence of UVA light; (blue) **Fe-HPAA** as-synthesized (from an acetate-buffered  $\text{FeSO}_4 \cdot 7\text{H}_2\text{O}$  + HPAAsolution) at 100 °C; (black) as-synthesized at 140 °C.

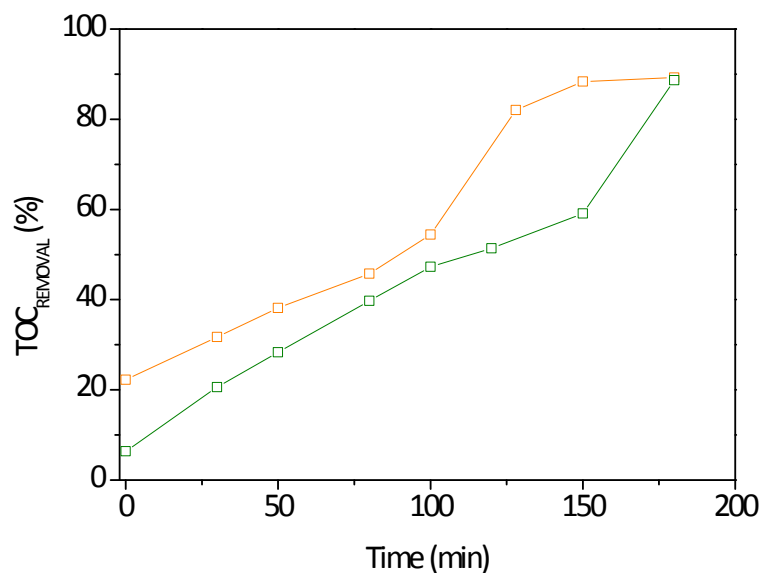

**Figure S18.** Time evolution of TOC removal for phenol degradation with **Fe-HPAA** under visible light for different cycles: first (orange) and second (olive).

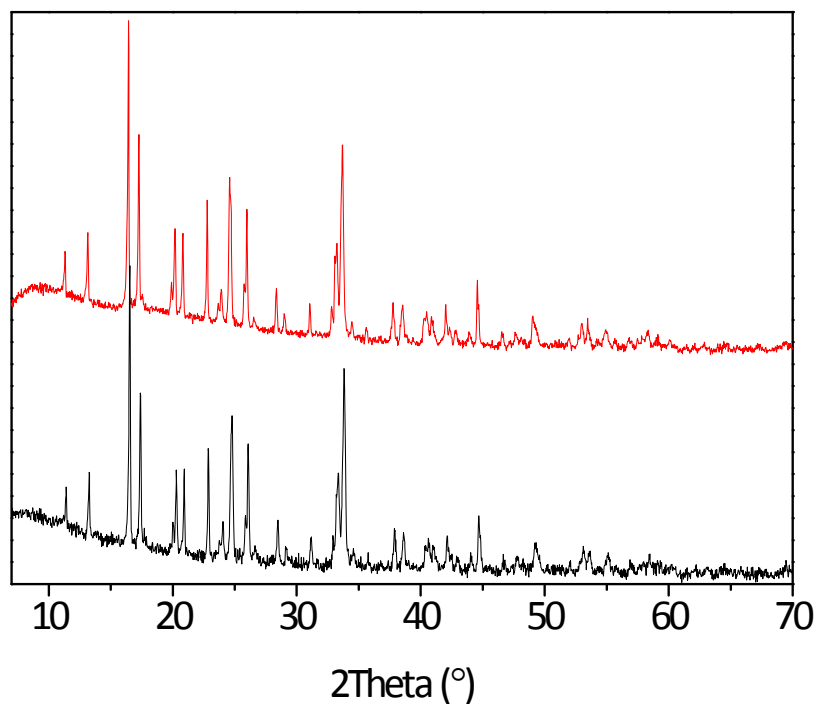

**Figure S19.** X-ray powder diffraction patterns for as-synthesized **Fe-HPAA** (red) and after photocatalytic test under visible irradiation (black).

**Table S1.** Elemental analysis and stoichiometries for compounds **Fe-NH<sub>3</sub>-xh** and **Fe<sub>x</sub>Zn<sub>1-x</sub>-NH<sub>3</sub>-xh**.

| Sample                                                      | Exposure time (xh) | %C    |       | %H    |       | %N    |       | Stoichiometry                                                                                                                     |
|-------------------------------------------------------------|--------------------|-------|-------|-------|-------|-------|-------|-----------------------------------------------------------------------------------------------------------------------------------|
|                                                             |                    | Found | Calc. | Found | Calc. | Found | Calc. |                                                                                                                                   |
| <b>Fe-NH<sub>3</sub>-xh</b>                                 | 12                 | 9.046 | 9.300 | 3.147 | 3.356 | 1.071 | 1.085 | Fe(HO <sub>3</sub> PCHOHCOO)(H <sub>2</sub> O) <sub>2.5</sub> (NH <sub>3</sub> ) <sub>0.2</sub>                                   |
|                                                             | 24                 | 8.967 | 9.179 | 3.285 | 3.543 | 1.953 | 2.141 | Fe(HO <sub>3</sub> PCHOHCOO)(H <sub>2</sub> O) <sub>2.5</sub> (NH <sub>3</sub> ) <sub>0.4</sub>                                   |
|                                                             | 36                 | 8.638 | 8.974 | 3.587 | 3.860 | 3.777 | 3.925 | Fe(HO <sub>3</sub> PCHOHCOO)(H <sub>2</sub> O) <sub>3</sub> (NH <sub>3</sub> ) <sub>0.75</sub>                                    |
|                                                             | 42                 | 8.669 | 8.946 | 3.595 | 3.904 | 4.257 | 4.173 | Fe(HO <sub>3</sub> PCHOHCOO)(H <sub>2</sub> O) <sub>3</sub> (NH <sub>3</sub> ) <sub>0.8</sub>                                     |
|                                                             | 48                 | 8.340 | 8.423 | 3.838 | 4.506 | 5.998 | 6.139 | Fe(HO <sub>3</sub> PCHOHCOO)(H <sub>2</sub> O) <sub>3</sub> (NH <sub>3</sub> ) <sub>1.25</sub>                                    |
|                                                             | 72                 | 7.615 | 8.179 | 4.629 | 4.890 | 8.796 | 8.346 | Fe(HO <sub>3</sub> PCHOHCOO)(H <sub>2</sub> O) <sub>3</sub> (NH <sub>3</sub> ) <sub>1.75</sub>                                    |
| <b>Fe<sub>0.71</sub>Zn<sub>0.29</sub>-NH<sub>3</sub>-xh</b> | 1                  | 8.634 | 8.699 | 3.520 | 3.942 | 3.007 | 3.044 | Fe <sub>0.71</sub> Zn <sub>0.29</sub> (HO <sub>3</sub> PCHOHCOO)(H <sub>2</sub> O) <sub>3</sub> (NH <sub>3</sub> ) <sub>0.6</sub> |
|                                                             | 5                  | 7.912 | 8.242 | 4.435 | 4.669 | 7.227 | 7.209 | Fe <sub>0.71</sub> Zn <sub>0.29</sub> (HO <sub>3</sub> PCHOHCOO)(H <sub>2</sub> O) <sub>3</sub> (NH <sub>3</sub> ) <sub>1.5</sub> |
| <b>Fe<sub>0.41</sub>Zn<sub>0.59</sub>-NH<sub>3</sub>-xh</b> | 1                  | 8.164 | 8.236 | 4.083 | 4.458 | 6.264 | 6.243 | Fe <sub>0.41</sub> Zn <sub>0.59</sub> (HO <sub>3</sub> PCHOHCOO)(H <sub>2</sub> O) <sub>3</sub> (NH <sub>3</sub> ) <sub>1.3</sub> |

**Table S2.** Selected crystallographic data for compounds **Fe-HPAA**, **Zn-HPAA** and **Fe<sub>x</sub>Zn<sub>1-x</sub>-HPAA**.

| Phase                               | Fe-HPAA                           | Fe <sub>0.89</sub> Zn <sub>0.11</sub> <sup>-</sup><br>HPAA            | Fe <sub>0.71</sub> Zn <sub>0.29</sub> <sup>-</sup><br>HPAA            | Fe <sub>0.54</sub> Zn <sub>0.46</sub> <sup>-</sup><br>HPAA            | Fe <sub>0.41</sub> Zn <sub>0.59</sub> <sup>-</sup><br>HPAA            | Zn-HPAA                           | Fe <sub>2</sub> P <sub>2</sub> O <sub>7</sub> |
|-------------------------------------|-----------------------------------|-----------------------------------------------------------------------|-----------------------------------------------------------------------|-----------------------------------------------------------------------|-----------------------------------------------------------------------|-----------------------------------|-----------------------------------------------|
| Space group                         | P 2 <sub>1</sub> /c               | P 2 <sub>1</sub> /c                                                   | P 2 <sub>1</sub> /c                                                   | P 2 <sub>1</sub> /c                                                   | P 2 <sub>1</sub> /c                                                   | P 2 <sub>1</sub> /c               | B 2 <sub>1</sub> /c                           |
| Chemical formula                    | C <sub>2</sub> FeO <sub>8</sub> P | C <sub>2</sub> Fe <sub>0.89</sub> Zn <sub>0.11</sub> O <sub>8</sub> P | C <sub>2</sub> Fe <sub>0.71</sub> Zn <sub>0.29</sub> O <sub>8</sub> P | C <sub>2</sub> Fe <sub>0.54</sub> Zn <sub>0.46</sub> O <sub>8</sub> P | C <sub>2</sub> Fe <sub>0.41</sub> Zn <sub>0.59</sub> O <sub>8</sub> P | C <sub>2</sub> ZnO <sub>8</sub> P | Fe <sub>2</sub> P <sub>2</sub> O <sub>7</sub> |
| Formula mass (g·mol <sup>-1</sup> ) | 238.83                            | 239.88                                                                | 241.60                                                                | 243.22                                                                | 244.46                                                                | 248.37                            | 285.64                                        |
| λ (Å)                               | 0.4124                            | 1.5418                                                                | 1.5418                                                                | 1.5418                                                                | 1.5418                                                                | 1.5418                            | 0.7093                                        |
| a (Å)                               | 5.7580(1)                         | 5.7508(1)                                                             | 5.75004(9)                                                            | 5.74238(9)                                                            | 5.74322(8)                                                            | 5.72097(9)                        | 13.298(5)                                     |
| b (Å)                               | 15.6192(3)                        | 15.5825(3)                                                            | 15.5733(2)                                                            | 15.5573(3)                                                            | 15.5598(2)                                                            | 15.5342(2)                        | 8.437(3)                                      |
| c (Å)                               | 7.8938(1)                         | 7.8847(2)                                                             | 7.8849(2)                                                             | 7.8745(2)                                                             | 7.8722(1)                                                             | 7.8516(1)                         | 8.993(3)                                      |
| β (°)                               | 109.707(1)                        | 109.745(1)                                                            | 109.869(1)                                                            | 109.985(1)                                                            | 110.1420(9)                                                           | 110.3112(9)                       | 104.24(1)                                     |
| Unit cell volume (Å <sup>3</sup> )  | 668.35(3)                         | 665.02(3)                                                             | 664.04(2)                                                             | 661.12(3)                                                             | 660.47(2)                                                             | 654.3(2)                          | 978.0(10)                                     |
| Z                                   | 4                                 | 4                                                                     | 4                                                                     | 4                                                                     | 4                                                                     | 4                                 | 8                                             |
| No. of independent reflections      | 1148                              | 707                                                                   | 706                                                                   | 703                                                                   | 703                                                                   | 697                               | 312                                           |
| Data/Restraints/<br>Parameters      | 954/19/75                         | 6191/19/82                                                            | 1106/19/82                                                            | 573/19/89                                                             | 1118/19/46                                                            | 1102/19/95                        | 433/31/77                                     |
| R <sub>WP</sub>                     | 0.0996                            | 0.0139                                                                | 0.0165                                                                | 0.0194                                                                | 0.0230                                                                | 0.0650                            | 0.0486                                        |
| R <sub>p</sub>                      | 0.0714                            | 0.0102                                                                | 0.0117                                                                | 0.0140                                                                | 0.0162                                                                | 0.0493                            | 0.0378                                        |
| R <sub>F</sub>                      | 0.0722                            | 0.0644                                                                | 0.0614                                                                | 0.0470                                                                | 0.0491                                                                | 0.0495                            | 0.0130                                        |

**Table S3.** Chemical composition for compounds  $\text{Fe}_x\text{M}_{1-x}\text{-HPAA}$  ( $\text{M} = \text{Mn}^{2+}$ ,  $\text{Co}^{2+}$  and  $\text{Zn}^{2+}$ ).

| Nominal $[\text{Fe}^0+\text{Fe}^{2+}]/\text{Zn}^{2+}$ | Chemical composition                                                                     |
|-------------------------------------------------------|------------------------------------------------------------------------------------------|
| 0.92 : 0.08                                           | $\text{Fe}_{0.89}\text{Zn}_{0.11}(\text{HO}_3\text{PCHOHCOO})(\text{H}_2\text{O})_{2.5}$ |
| 0.79 : 0.21                                           | $\text{Fe}_{0.71}\text{Zn}_{0.29}(\text{HO}_3\text{PCHOHCOO})(\text{H}_2\text{O})_{2.5}$ |
| 0.68 : 0.32                                           | $\text{Fe}_{0.54}\text{Zn}_{0.46}(\text{HO}_3\text{PCHOHCOO})(\text{H}_2\text{O})_{2.5}$ |
| 0.55 : 0.45                                           | $\text{Fe}_{0.41}\text{Zn}_{0.59}(\text{HO}_3\text{PCHOHCOO})(\text{H}_2\text{O})_{2.5}$ |
|                                                       |                                                                                          |
| Nominal $[\text{Fe}^0+\text{Fe}^{2+}]/\text{Co}^{2+}$ | Chemical composition                                                                     |
| 0.79 : 0.21                                           | $\text{Fe}_{0.78}\text{Co}_{0.22}(\text{HO}_3\text{PCHOHCOO})(\text{H}_2\text{O})_{2.5}$ |
| 0.68 : 0.32                                           | $\text{Fe}_{0.66}\text{Co}_{0.34}(\text{HO}_3\text{PCHOHCOO})(\text{H}_2\text{O})_{2.5}$ |
| 0.55 : 0.45                                           | $\text{Fe}_{0.59}\text{Co}_{0.41}(\text{HO}_3\text{PCHOHCOO})(\text{H}_2\text{O})_{2.5}$ |
|                                                       |                                                                                          |
| Nominal $[\text{Fe}^0+\text{Fe}^{2+}]/\text{Mn}^{2+}$ | Chemical composition                                                                     |
| 0.92 : 0.08                                           | $\text{Fe}_{0.85}\text{Mn}_{0.15}(\text{HO}_3\text{PCHOHCOO})(\text{H}_2\text{O})_{2.5}$ |
| 0.79 : 0.21                                           | $\text{Fe}_{0.8}\text{Mn}_{0.2}(\text{HO}_3\text{PCHOHCOO})(\text{H}_2\text{O})_{2.5}$   |

**Table S4.** XPS Fe(II)/Fe(III) atomic ratio.

| Catalyst                                 |                             | Pollutant      | Radiation | Fe(II) | Fe(III) | Fe(II)/Fe(III) |
|------------------------------------------|-----------------------------|----------------|-----------|--------|---------|----------------|
| Fe-HPAA                                  | As synthesized              | Phenol         | Visible   | 61.9%  | 38.1%   | 1.62           |
|                                          | After a photocatalytic test |                |           | 49.0%  | 51.0%   | 0.96           |
|                                          | As synthesized              | Methylene blue | UVA       | 56.8%  | 43.2%   | 1.32           |
|                                          | After a photocatalytic test |                |           | 50.3%  | 49.7%   | 1.01           |
| $\text{Fe}_{0.71}\text{Zn}_{0.29}$ -HPAA | As synthesized              | Phenol         | Visible   | 66.1%  | 33.9%   | 1.95           |
|                                          | After a photocatalytic test |                |           | 51.8%  | 48.2%   | 1.07           |
|                                          | As synthesized              | Methylene blue | UVA       | 72.9%  | 27.1%   | 2.69           |
|                                          | After a photocatalytic test |                |           | 69.2%  | 30.8%   | 2.24           |
